# Supplementary material for: Epidemiological, Clinical, Patient-Reported and Economic Burden of Inflammatory Bowel Disease (Ulcerative colitis and Crohn’s disease) in Spain: A Systematic Review
Source: PubMed Central journal article supplement — Adv Ther. 2023 Mar 16;40(5):1975–2014. doi: 10.1007/s12325-023-02473-6 (PMC10129998; doi:10.1007/s12325-023-02473-6), 2023-03-16
Supplement: 12325_2023_2473_MOESM1_ESM.pdf [file 12325_2023_2473_MOESM1_ESM.pdf]

## SUPPLEMENTARY MATERIAL

**Title:** *Epidemiological, clinical, patient-reported and economic burden of inflammatory bowel disease (ulcerative colitis and Crohn's disease) in Spain: A systematic review*

**Authors:** Manuel Barreiro-de Acosta<sup>1</sup>, Alberto Molero<sup>2</sup>, Esther Artime<sup>2</sup>, Silvia Díaz-Cerezo<sup>2</sup>, Luis Lizán<sup>3,4</sup>, Hector de Paz HD<sup>3</sup>, Maria Dolores Martín-Arranz<sup>5</sup>.

### **Affiliations:**

<sup>1</sup> Gastroenterology Department, Hospital Clínico Universitario de Santiago de Compostela, Santiago, Spain

<sup>2</sup> Medical Department, Lilly Spain, Alcobendas, Spain

<sup>3</sup> Health Outcomes Research Department, Outcomes'10, S.L., Castellón de la Plana, Spain

<sup>4</sup> Department of Medicine, Jaume I University, Castellón de la Plana, Spain.

<sup>5</sup> Department of Gastroenterology of La Paz University Hospital. School of Medicine. Universidad Autónoma de Madrid. Hospital La Paz Institute for Health Research, La Paz Hospital, Madrid, Spain

**Corresponding author:** Alberto Molero [molero\\_alberto@lilly.com](mailto:molero_alberto@lilly.com)

Table S1. Search strategy

| <b>Search strategy for Cochrane and PubMed/MedLine</b> |                                                               |
|--------------------------------------------------------|---------------------------------------------------------------|
| Disease                                                |                                                               |
| 1                                                      | Inflammatory Bowel Diseases [MeSH]                            |
| 2                                                      | Inflammatory Bowel Diseases [tiab]                            |
| 3                                                      | Crohn Disease [MeSH]                                          |
| 4                                                      | Crohn Disease [tiab]                                          |
| 5                                                      | Colitis, Ulcerative [MeSH]                                    |
| 6                                                      | Ulcerative colitis [tiab]                                     |
| Clinical Burden                                        |                                                               |
| 7                                                      | Epidemiologic factors [MeSH]                                  |
| 8                                                      | Risk factors [MeSH]                                           |
| 9                                                      | Incidence [MeSH]                                              |
| 10                                                     | Prevalence [MeSH]                                             |
| 11                                                     | Comorbidity [MeSH]                                            |
| 12                                                     | Mortality [MeSH]                                              |
| 13                                                     | Survival [MeSH]                                               |
| 14                                                     | Age of Onset [MeSH]                                           |
| 15                                                     | Epidemiologic factors [tiab]                                  |
| 16                                                     | Risk factors [tiab]                                           |
| 17                                                     | Incidence [tiab]                                              |
| 18                                                     | Prevalence [tiab]                                             |
| 19                                                     | Comorbidity [tiab]                                            |
| 20                                                     | Mortality [tiab]                                              |
| 21                                                     | Survival [tiab]                                               |
| 22                                                     | Age of Onset [tiab]                                           |
| Humanistic burden                                      |                                                               |
| 23                                                     | Quality of life [MeSH]                                        |
| 24                                                     | Patient-Reported Outcome Measures [MeSH]                      |
| 25                                                     | Quality of life [tiab]                                        |
| 26                                                     | Patient-Reported Outcome Measures [tiab]                      |
| 27                                                     | Health-related quality of life [tiab]                         |
| 28                                                     | Health status [tiab]                                          |
| 29                                                     | IBD-Control Questionnaire [tiab]                              |
| 30                                                     | Inflammatory Bowel Disease Questionnaire [tiab]               |
| 31                                                     | IBDQ [tiab]                                                   |
| 32                                                     | Functional Bowel Disease Severity Index [tiab]                |
| 33                                                     | FBDSI [tiab]                                                  |
| 34                                                     | Irritable Bowel Syndrome Quality of Life Questionnaire [tiab] |
| 35                                                     | IBSQOL [tiab]                                                 |
| 36                                                     | Simple Clinical Colitis Activity Index [tiab]                 |
| 37                                                     | SCCAI [tiab]                                                  |
| 38                                                     | Pediatric Ulcerative Colitis Activity Index [tiab]            |
| 39                                                     | PUCAI [tiab]                                                  |
| 40                                                     | Patient-reported outcome derived from the Mayo score [tiab]   |
| Economic burden                                        |                                                               |
| 41                                                     | Standard of care [MeSH]                                       |
| 42                                                     | Treatment patterns [tiab]                                     |
| 43                                                     | Standard of care [tiab]                                       |

|                                                                                                                     |                                                                    |
|---------------------------------------------------------------------------------------------------------------------|--------------------------------------------------------------------|
| 44                                                                                                                  | Global Burden of Disease [MeSH]                                    |
| 45                                                                                                                  | Cost of Illness [MeSH]                                             |
| 46                                                                                                                  | Cost of Illness [tiab]                                             |
| 47                                                                                                                  | Costs and cost analysis [MeSH]                                     |
| 48                                                                                                                  | Economic burden [tiab]                                             |
| 49                                                                                                                  | Burden [tiab]                                                      |
| 50                                                                                                                  | Cost [tiab]                                                        |
| 51                                                                                                                  | Absenteeism [tiab]                                                 |
| 52                                                                                                                  | Presenteeism [tiab]                                                |
| 53                                                                                                                  | Productivity [tiab]                                                |
| 54                                                                                                                  | Activity impairment [tiab]                                         |
| 55                                                                                                                  | Disability [tiab]                                                  |
| 56                                                                                                                  | Economics [tiab]                                                   |
| Country                                                                                                             |                                                                    |
| 57                                                                                                                  | Spain [All fields]                                                 |
| 58                                                                                                                  | Spanish [All fields]                                               |
| 59                                                                                                                  | Andalucia [All fields]                                             |
| 60                                                                                                                  | Aragon [All fields]                                                |
| 61                                                                                                                  | Asturias [All fields]                                              |
| 62                                                                                                                  | Balear* [All fields]                                               |
| 63                                                                                                                  | Canarias [All fields]                                              |
| 64                                                                                                                  | Cantabria [All fields]                                             |
| 65                                                                                                                  | Castilla* [All fields]                                             |
| 66                                                                                                                  | Cataluña [All fields]                                              |
| 67                                                                                                                  | Valenciana [All fields]                                            |
| 68                                                                                                                  | Extremadura [All fields]                                           |
| 69                                                                                                                  | Galicia [All fields]                                               |
| 70                                                                                                                  | Madrid [All fields]                                                |
| 71                                                                                                                  | Murcia [All fields]                                                |
| 72                                                                                                                  | Navarra [All fields]                                               |
| 73                                                                                                                  | Vasco [All fields]                                                 |
| 74                                                                                                                  | Rioja [All fields]                                                 |
| (OR 1-6) AND (OR 7-56) AND (OR 57-74) ; <b>Filters applied:</b> Publication dates, 2011 (February) - 2021 (October) |                                                                    |
| <b>Search strategy for <i>Medicina en Español</i> (MEDES)</b>                                                       |                                                                    |
| Disease                                                                                                             |                                                                    |
| 1                                                                                                                   | Enfermedad inflamatoria intestinal [título/resumen/palabras_clave] |
| 2                                                                                                                   | Inflammatory Bowel Diseases [título/resumen/palabras_clave]        |
| 3                                                                                                                   | Enfermedad de Crohn [título/resumen/palabras_clave]                |
| 4                                                                                                                   | Crohn Disease [título/resumen/palabras_clave]                      |
| 5                                                                                                                   | Colitis ulcerativa [título/resumen/palabras_clave]                 |
| 6                                                                                                                   | Ulcerative Colitis [título/resumen/palabras_clave]                 |
| Clinical Burden                                                                                                     |                                                                    |
| 7                                                                                                                   | Epidemiologic factors [título/resumen/palabras_clave]              |
| 8                                                                                                                   | Risk factors [título/resumen/palabras_clave]                       |
| 9                                                                                                                   | Incidence [título/resumen/palabras_clave]                          |
| 10                                                                                                                  | Prevalence [título/resumen/palabras_clave]                         |
| 11                                                                                                                  | Comorbidity [título/resumen/palabras_clave]                        |
| 12                                                                                                                  | Mortality [título/resumen/palabras_clave]                          |
| 13                                                                                                                  | Survival [título/resumen/palabras_clave]                           |
| 14                                                                                                                  | Age of Onset [título/resumen/palabras_clave]                       |
| 15                                                                                                                  | Factores epidemiológicos [título/resumen/palabras_clave]           |
| 16                                                                                                                  | Factores de riesgo [título/resumen/palabras_clave]                 |
| 17                                                                                                                  | Incidencia [título/resumen/palabras_clave]                         |
| 18                                                                                                                  | Prevalencia [título/resumen/palabras_clave]                        |
| 19                                                                                                                  | Comorbilidad [título/resumen/palabras_clave]                       |
| 20                                                                                                                  | Mortalidad [título/resumen/palabras_clave]                         |

|                                                                                                      |                                                                                        |
|------------------------------------------------------------------------------------------------------|----------------------------------------------------------------------------------------|
| 21                                                                                                   | Supervivencia [título/resumen/palabras_clave]                                          |
| 22                                                                                                   | Edad inicio de los síntomas [título/resumen/palabras_clave]                            |
| Humanistic burden                                                                                    |                                                                                        |
| 23                                                                                                   | Quality of life [título/resumen/palabras_clave]                                        |
| 24                                                                                                   | Patient-Reported Outcome Measures [título/resumen/palabras_clave]                      |
| 25                                                                                                   | Calidad de vida [título/resumen/palabras_clave]                                        |
| 26                                                                                                   | Medidas reportadas por el paciente [título/resumen/palabras_clave]                     |
| 27                                                                                                   | Medidas informadas por el paciente [título/resumen/palabras_clave]                     |
| 28                                                                                                   | Health-related quality of life [título/resumen/palabras_clave]                         |
| 29                                                                                                   | Health status [título/resumen/palabras_clave]                                          |
| 30                                                                                                   | Estado de salud [título/resumen/palabras_clave]                                        |
| 31                                                                                                   | IBD-Control Questionnaire [título/resumen/palabras_clave]                              |
| 32                                                                                                   | Inflammatory Bowel Disease Questionnaire [título/resumen/palabras_clave]               |
| 33                                                                                                   | IBDQ [título/resumen/palabras_clave]                                                   |
| 34                                                                                                   | Functional Bowel Disease Severity Index [título/resumen/palabras_clave]                |
| 35                                                                                                   | FBDSI [título/resumen/palabras_clave]                                                  |
| 36                                                                                                   | Irritable Bowel Syndrome Quality of Life Questionnaire [título/resumen/palabras_clave] |
| 37                                                                                                   | IBSQOL [título/resumen/palabras_clave]                                                 |
| 38                                                                                                   | Simple Clinical Colitis Activity Index [título/resumen/palabras_clave]                 |
| 39                                                                                                   | SCCAI [título/resumen/palabras_clave]                                                  |
| 40                                                                                                   | Pediatric Ulcerative Colitis Activity Index [título/resumen/palabras_clave]            |
| 41                                                                                                   | PUCAI [título/resumen/palabras_clave]                                                  |
| 43                                                                                                   | Patient-reported outcome derived from the Mayo score [título/resumen/palabras_clave]   |
| Economic burden                                                                                      |                                                                                        |
| 44                                                                                                   | Standard of care [título/resumen/palabras_clave]                                       |
| 45                                                                                                   | Treatment patterns [título/resumen/palabras_clave]                                     |
| 46                                                                                                   | Pauta de tratamiento [título/resumen/palabras_clave]                                   |
| 47                                                                                                   | Economic [título/resumen/palabras_clave]                                               |
| 48                                                                                                   | Económico [título/resumen/palabras_clave]                                              |
| 49                                                                                                   | Burden [título/resumen/palabras_clave]                                                 |
| 50                                                                                                   | Carga [título/resumen/palabras_clave]                                                  |
| 51                                                                                                   | Cost [título/resumen/palabras_clave]                                                   |
| 52                                                                                                   | Coste [título/resumen/palabras_clave]                                                  |
| 53                                                                                                   | Absenteeism [título/resumen/palabras_clave]                                            |
| 54                                                                                                   | Absentismo [título/resumen/palabras_clave]                                             |
| 55                                                                                                   | Presenteeism [título/resumen/palabras_clave]                                           |
| 56                                                                                                   | Presentismo [título/resumen/palabras_clave]                                            |
| 57                                                                                                   | Productivity [título/resumen/palabras_clave]                                           |
| 58                                                                                                   | Productividad [título/resumen/palabras_clave]                                          |
| 59                                                                                                   | Activity impairment [título/resumen/palabras_clave]                                    |
| 60                                                                                                   | Deterioro [título/resumen/palabras_clave]                                              |
| 61                                                                                                   | Disability [título/resumen/palabras_clave]                                             |
| 62                                                                                                   | Discapacidad [título/resumen/palabras_clave]                                           |
| 63                                                                                                   | Economía [título/resumen/palabras_clave]                                               |
| (OR 1-6) AND (OR 7-63) ; <b>Filters applied:</b> Publication dates, 2011 (February) - 2021 (October) |                                                                                        |
| <b>Search strategy for <i>Índice Bibliográfico Español en Ciencias de la Salud (IBECS)</i></b>       |                                                                                        |
| Disease                                                                                              |                                                                                        |
| 1                                                                                                    | Enfermedad inflamatoria intestinal [título, resumen, asunto]                           |
| 2                                                                                                    | Inflammatory Bowel Diseases [título, resumen, asunto]                                  |
| 3                                                                                                    | Enfermedad de Crohn [título, resumen, asunto]                                          |
| 4                                                                                                    | Crohn Disease [título, resumen, asunto]                                                |
| 5                                                                                                    | Colitis ulcerativa [título, resumen, asunto]                                           |
| 6                                                                                                    | Ulcerative Colitis [título, resumen, asunto]                                           |
| Clinical Burden                                                                                      |                                                                                        |
| 7                                                                                                    | Epidemiologic factors [título, resumen, asunto]                                        |
| 8                                                                                                    | risk factors [título, resumen, asunto]                                                 |

|                   |                                                                                  |
|-------------------|----------------------------------------------------------------------------------|
| 9                 | incidence [título, resumen, asunto]                                              |
| 10                | prevalence [título, resumen, asunto]                                             |
| 11                | Comorbidity [título, resumen, asunto]                                            |
| 12                | mortality [título, resumen, asunto]                                              |
| 13                | survival [título, resumen, asunto]                                               |
| 14                | Age of Onset [título, resumen, asunto]                                           |
| 15                | Factores epidemiológicos [título, resumen, asunto]                               |
| 16                | Factores de riesgo [título, resumen, asunto]                                     |
| 17                | Incidencia [título, resumen, asunto]                                             |
| 18                | Prevalencia [título, resumen, asunto]                                            |
| 19                | Comorbilidad [título, resumen, asunto]                                           |
| 20                | Mortalidad [título, resumen, asunto]                                             |
| 21                | Supervivencia [título, resumen, asunto]                                          |
| 22                | Edad inicio de los síntomas [título, resumen, asunto]                            |
| Humanistic burden |                                                                                  |
| 23                | Quality of life [título, resumen, asunto]                                        |
| 24                | Patient-Reported Outcome Measures [título, resumen, asunto]                      |
| 25                | Calidad de vida [título, resumen, asunto]                                        |
| 26                | Medidas reportadas por el paciente [título, resumen, asunto]                     |
| 27                | Medidas informadas por el paciente [título, resumen, asunto]                     |
| 28                | Health-related quality of life [título, resumen, asunto]                         |
| 29                | Health status [título, resumen, asunto]                                          |
| 30                | Estado de salud [título, resumen, asunto]                                        |
| 31                | IBD-Control Questionnaire [título, resumen, asunto]                              |
| 32                | Inflammatory Bowel Disease Questionnaire [título, resumen, asunto]               |
| 33                | IBDQ [título, resumen, asunto]                                                   |
| 34                | Functional Bowel Disease Severity Index [título, resumen, asunto]                |
| 35                | FBDSI [título, resumen, asunto]                                                  |
| 36                | Irritable Bowel Syndrome Quality of Life Questionnaire [título, resumen, asunto] |
| 37                | IBSQOL [título, resumen, asunto]                                                 |
| 38                | Simple Clinical Colitis Activity Index [título, resumen, asunto]                 |
| 39                | SCCAI [título, resumen, asunto]                                                  |
| 40                | Pediatric Ulcerative Colitis Activity Index [título, resumen, asunto]            |
| 41                | PUCAI [título, resumen, asunto]                                                  |
| 43                | Patient-reported outcome derived from the Mayo score [título, resumen, asunto]   |
| Economic burden   |                                                                                  |
| 44                | Standard of care [título, resumen, asunto]                                       |
| 45                | Treatment patterns [título/resumen/palabras_clave]                               |
| 46                | Pauta de tratamiento [título/resumen/palabras_clave]                             |
| 47                | Economic [título, resumen, asunto]                                               |
| 48                | Económico [título, resumen, asunto]                                              |
| 49                | Burden [título, resumen, asunto]                                                 |
| 50                | Carga [título, resumen, asunto]                                                  |
| 51                | Cost [título, resumen, asunto]                                                   |
| 52                | Coste [título, resumen, asunto]                                                  |
| 53                | Absenteeism [título, resumen, asunto]                                            |
| 54                | Absentismo [título, resumen, asunto]                                             |
| 55                | Presenteeism [título, resumen, asunto]                                           |
| 56                | Presentismo [título, resumen, asunto]                                            |
| 57                | Productivity [título, resumen, asunto]                                           |
| 58                | Productividad [título, resumen, asunto]                                          |
| 59                | Activity impairment [título, resumen, asunto]                                    |
| 60                | Deterioro [título, resumen, asunto]                                              |
| 61                | Disability [título, resumen, asunto]                                             |
| 62                | Discapacidad [título, resumen, asunto]                                           |
| 63                | Economía [título, resumen, asunto]                                               |

(OR 1-6) AND (OR 7-63) ; **Filters applied:** Publication dates, 2011 (February) - 2021 (October)

Table S2. Eligibility criteria

| Study Characteristic           | Eligible                                                                                                                                                                                                                                                                                                                                                                                                                                                                                                                                                                                                                                                           | Ineligible                                                                                                                                    |
|--------------------------------|--------------------------------------------------------------------------------------------------------------------------------------------------------------------------------------------------------------------------------------------------------------------------------------------------------------------------------------------------------------------------------------------------------------------------------------------------------------------------------------------------------------------------------------------------------------------------------------------------------------------------------------------------------------------|-----------------------------------------------------------------------------------------------------------------------------------------------|
| <b>Patient population</b>      | <ul style="list-style-type: none"> <li>Patients with confirmed IBD (including CD and UC) of any age.</li> </ul>                                                                                                                                                                                                                                                                                                                                                                                                                                                                                                                                                    | <ul style="list-style-type: none"> <li>Studies not including Spanish patients with IBD, CD, or UC</li> </ul>                                  |
| <b>Intervention-Treatment</b>  | <ul style="list-style-type: none"> <li>NA</li> </ul>                                                                                                                                                                                                                                                                                                                                                                                                                                                                                                                                                                                                               | <ul style="list-style-type: none"> <li>Studies focusing on specific drugs</li> </ul>                                                          |
| <b>Intervention-Comparison</b> | <ul style="list-style-type: none"> <li>No restrictions were applied to this parameter.</li> </ul>                                                                                                                                                                                                                                                                                                                                                                                                                                                                                                                                                                  | <ul style="list-style-type: none"> <li>No restrictions were applied to this parameter.</li> </ul>                                             |
| <b>Outcomes</b>                | <p>Epidemiology:</p> <ul style="list-style-type: none"> <li>Incidence</li> <li>Prevalence</li> <li>Mortality / Survival</li> </ul> <p>Demographic, clinical, and treatment characteristics:</p> <ul style="list-style-type: none"> <li>Demographic characteristics</li> <li>Risk factors</li> <li>Comorbidity</li> <li>Disease severity</li> <li>Age of onset</li> <li>Treatment utilisation patterns</li> </ul> <p>Patient-reported outcomes</p> <p>Resource utilisation and costs:</p> <ul style="list-style-type: none"> <li>Resource use</li> <li>Direct cost</li> <li>Pharmacological cost</li> <li>Productivity</li> <li>Absenteeism/presenteeism</li> </ul> | NA                                                                                                                                            |
| <b>Study design</b>            | <ul style="list-style-type: none"> <li>Observational studies</li> </ul>                                                                                                                                                                                                                                                                                                                                                                                                                                                                                                                                                                                            | <ul style="list-style-type: none"> <li>Clinical trials</li> <li>Narrative reviews</li> <li>Systematic reviews and Meta-analysis</li> </ul>    |
| <b>Type of publication</b>     | <ul style="list-style-type: none"> <li>Original articles</li> <li>Conference abstracts</li> </ul>                                                                                                                                                                                                                                                                                                                                                                                                                                                                                                                                                                  | <ul style="list-style-type: none"> <li>Review articles</li> <li>Editorial</li> <li>Opinion articles</li> <li>Letters to the editor</li> </ul> |
| <b>Time Frame</b>              | <ul style="list-style-type: none"> <li>2011 (February)- 2021 (October)</li> </ul>                                                                                                                                                                                                                                                                                                                                                                                                                                                                                                                                                                                  | <ul style="list-style-type: none"> <li>Publications prior to 2011 (February)</li> </ul>                                                       |
| <b>Language</b>                | <ul style="list-style-type: none"> <li>English</li> <li>Spanish</li> </ul>                                                                                                                                                                                                                                                                                                                                                                                                                                                                                                                                                                                         | <ul style="list-style-type: none"> <li>Non-English or non-Spanish</li> </ul>                                                                  |
| <b>Country</b>                 | <ul style="list-style-type: none"> <li>Studies carried out in Spain or multi-country studies, including data from the Spanish population</li> </ul>                                                                                                                                                                                                                                                                                                                                                                                                                                                                                                                | <ul style="list-style-type: none"> <li>Studies carried out outside Spain, not including/reporting data of the Spanish population</li> </ul>   |
